# Supplementary material for: Telehealth interventions during COVID-19 pandemic: a scoping review of applications, challenges, privacy and security issues
Source: PubMed Central journal article supplement — BMJ Health Care Inform. 2023 Aug 4;30(1):e100676. doi: 10.1136/bmjhci-2022-100676 (PMC10407386; doi:10.1136/bmjhci-2022-100676), 2023-08-04
Supplement: bmjhci-2022-100676supp002.pdf [file bmjhci-2022-100676supp002.pdf]

**Table 2:** Proposed Telehealth Interventions

| Ref # | Intervention Type            | Technology used                                                                        | Advantages/Services                                                                                                                                                                                                                                                                                                                                                                                                                                                         | Challenges/Limitations                                                                                                                                                                                                                                                                                                                                                                                                                                                                                                                                                          |
|-------|------------------------------|----------------------------------------------------------------------------------------|-----------------------------------------------------------------------------------------------------------------------------------------------------------------------------------------------------------------------------------------------------------------------------------------------------------------------------------------------------------------------------------------------------------------------------------------------------------------------------|---------------------------------------------------------------------------------------------------------------------------------------------------------------------------------------------------------------------------------------------------------------------------------------------------------------------------------------------------------------------------------------------------------------------------------------------------------------------------------------------------------------------------------------------------------------------------------|
| [1]   | AI-Based<br>Scope: USA       | Video visits, virtual check-in, and communication via an online portal/mobile platform | <ul style="list-style-type: none"> <li>- Online surgery, screening, diagnosis, and disinfection</li> <li>- Patient's triage and monitoring, care, manufacturing, and logistics</li> </ul>                                                                                                                                                                                                                                                                                   | <ul style="list-style-type: none"> <li>- Network issues (especially outside of the healthcare facility)</li> <li>- Cost associated with developing, subscribing, using, or maintaining the system</li> <li>- While telehealth technologies supply high-quality healthcare services, they cannot entirely replace physical treatment</li> <li>- System reliability issues</li> <li>- Performance and accuracy issues</li> </ul>                                                                                                                                                  |
| [2]   | AI-Based<br>Scope: Global    | Robotic systems                                                                        | <ul style="list-style-type: none"> <li>- Disease detection and diagnosis</li> <li>- Virology and pathogenesis</li> <li>- Drug and vaccine development</li> <li>- Epidemic and transmission prediction</li> <li>- Medical image inspection</li> </ul>                                                                                                                                                                                                                        | <ul style="list-style-type: none"> <li>- Dataset availability issues (e.g. lack of enough training data for AI-based systems)</li> <li>- Data imbalances between negative and positive samples</li> <li>- A large amount of noisy data and rumours</li> <li>- Scarcity of knowledge in the intersection of computer and medical sciences</li> <li>- Privacy, policy and security issues</li> </ul>                                                                                                                                                                              |
| [9]   | AI-Based<br>Scope: Global    | Wearable sensor devices, mobile devices                                                | <ul style="list-style-type: none"> <li>- Patient's triage, monitoring, and contact tracing,</li> <li>- Disease detection, treatment, and diagnosis</li> <li>- Cardiovascular evaluation, respiratory assessment, clinical symptom monitoring, tele-imaging, tele-ICU, telerehabilitation, and telerobotics</li> </ul>                                                                                                                                                       | <ul style="list-style-type: none"> <li>- Dataset availability issues (e.g. lack of enough training data for AI-based systems)</li> <li>- Ethical issues</li> <li>- Privacy, policy and security issues</li> <li>- Power consumption</li> <li>- System reliability issues</li> <li>- Cost associated with developing, subscribing, using, or maintaining the system</li> </ul>                                                                                                                                                                                                   |
| [11]  | AI-Based<br>Scope: Turkey    | Wearable IoMT (Internet of Medical Things) devices                                     | <ul style="list-style-type: none"> <li>- Online consultation, virtual real-time monitoring, diagnosis, and teleophthalmology</li> <li>- Enhancing bandwidth efficiency and reducing latency</li> </ul>                                                                                                                                                                                                                                                                      | <ul style="list-style-type: none"> <li>- Policy and regulatory issues</li> <li>- Privacy, policy and security issues</li> </ul>                                                                                                                                                                                                                                                                                                                                                                                                                                                 |
| [12]  | Non-AI-Based<br>Scope: India | Mobile application, Bluetooth, and GPS technologies                                    | <ul style="list-style-type: none"> <li>- Contact tracing, tracking, monitoring, and sensitization</li> <li>- Notifying users when they are near a COVID-19 infected person</li> <li>- Disease spread analysis</li> </ul>                                                                                                                                                                                                                                                    | <ul style="list-style-type: none"> <li>- Privacy, policy and security issues</li> <li>- Compatibility issues (e.g. some systems only support Android 5.0 and higher, or iOS 10.3 and higher)</li> </ul>                                                                                                                                                                                                                                                                                                                                                                         |
| [13]  | AI-Based<br>Scope: Global    | Wearable devices, chatbots                                                             | <ul style="list-style-type: none"> <li>- Eliminating the distance between patient and provider via virtual/remote treatment</li> <li>- Real-time monitoring and diagnosis Reducing the time and the cost associated with access to healthcare</li> <li>- Reducing the risks of exposing providers and patients to the virus; Disease detection</li> <li>- Track vital signs and alert when an outlying conditions are detected</li> <li>- Patient initial triage</li> </ul> | <ul style="list-style-type: none"> <li>- Adoption rates are restricted to medical emergencies, which is insufficient</li> <li>- Lack of knowledge, technical literacy, and skills needed to use virtual medical services</li> <li>- Network issues</li> <li>- System reliability issues</li> <li>- Privacy, policy and security issues</li> <li>- Policy and regulatory issues</li> <li>- Healthcare is highly resistant to change</li> <li>- While telehealth technologies supply high-quality healthcare services, they cannot entirely replace physical treatment</li> </ul> |
| [14]  | Non-AI-Based<br>Scope: China | UWB (Ultrawideband) Radar sensor, Smart bracelet                                       | <ul style="list-style-type: none"> <li>- Remotely monitor self-isolated patient's health status, reduce medical staff's risk caused by contact, track detailed and accurate respiration status, obtaining</li> </ul>                                                                                                                                                                                                                                                        | <ul style="list-style-type: none"> <li>- Cost associated with developing, subscribing, using, or maintaining the system</li> </ul>                                                                                                                                                                                                                                                                                                                                                                                                                                              |

|      |                                 |                                                                                                                                                         |                                                                                                                                                                                                                                                                                                                                                                   |                                                                                                                                                                                                                                                                                                                                                                                                                                                                                                                                                                                                                                                                                                                              |
|------|---------------------------------|---------------------------------------------------------------------------------------------------------------------------------------------------------|-------------------------------------------------------------------------------------------------------------------------------------------------------------------------------------------------------------------------------------------------------------------------------------------------------------------------------------------------------------------|------------------------------------------------------------------------------------------------------------------------------------------------------------------------------------------------------------------------------------------------------------------------------------------------------------------------------------------------------------------------------------------------------------------------------------------------------------------------------------------------------------------------------------------------------------------------------------------------------------------------------------------------------------------------------------------------------------------------------|
|      |                                 |                                                                                                                                                         | patient's blood oxygen saturation and heartbeat information                                                                                                                                                                                                                                                                                                       |                                                                                                                                                                                                                                                                                                                                                                                                                                                                                                                                                                                                                                                                                                                              |
| [15] | Non-AI-Based<br>Scope: Ecuador  | Teleconsultation apps (mobile phones, landlines, computers, tablets, etc.), Samsung Health, Google Fit, Mi Health (Xiaomi), Apple Health, Huawei Health | <ul style="list-style-type: none"> <li>- Online consultations</li> <li>- Tele-monitoring and diagnosis</li> <li>- Video conferencing</li> </ul>                                                                                                                                                                                                                   | <ul style="list-style-type: none"> <li>- Lack of knowledge and awareness about telemedicine and its benefits</li> <li>- People's uncertainty about using technology</li> <li>- Lack of public or private sector support for advancing medical technology that meets the demands of the populace</li> <li>- Lack of knowledge, technical literacy, and skills needed to use virtual medical services</li> <li>- While telehealth technologies supply high-quality healthcare services, they cannot entirely replace physical treatment</li> <li>- Performance and accuracy issues</li> </ul>                                                                                                                                  |
| [26] | AI-Based<br>Scope: UK           | Video conferencing                                                                                                                                      | <ul style="list-style-type: none"> <li>- Online consultation, health checkup, and self-screening</li> <li>- Online Medical test, ambulance/ appointment booking</li> <li>- Dispense medicines, and records keeping</li> </ul>                                                                                                                                     | <ul style="list-style-type: none"> <li>- User service misuse</li> <li>- While telehealth technologies supply high-quality healthcare services, they cannot entirely replace physical treatment</li> <li>- Policy and regulatory issues</li> <li>- Cost associated with developing, subscribing, using, or maintaining the system</li> <li>- People's uncertainty about using technology</li> <li>- System reliability issues</li> <li>- Network issues</li> </ul>                                                                                                                                                                                                                                                            |
| [27] | AI-Based<br>Scope: India        | Smartphone, WebRTC video conferencing                                                                                                                   | <ul style="list-style-type: none"> <li>- Patient's remote diagnosis and stratification</li> <li>- Patient triage and treatment suggestions</li> <li>- Special consideration to cyber security</li> <li>- Extending quality healthcare to all communities (SDG's goal)</li> <li>- Increasing efficiency in diagnosis and improving the quality of care</li> </ul>  | <ul style="list-style-type: none"> <li>- Cost associated with developing, subscribing, using, or maintaining the system</li> <li>- Lack of knowledge, technical literacy, and skills needed to use virtual medical services</li> </ul>                                                                                                                                                                                                                                                                                                                                                                                                                                                                                       |
| [28] | AI-Based<br>Scope: China        | 3D pose, cameras, contactless patient positioning system                                                                                                | <ul style="list-style-type: none"> <li>- Contactless patient positioning and treatment (reducing the risk of medical professionals from getting infected)</li> <li>- Remote scanning</li> </ul>                                                                                                                                                                   | <ul style="list-style-type: none"> <li>- Performance and accuracy issues</li> </ul>                                                                                                                                                                                                                                                                                                                                                                                                                                                                                                                                                                                                                                          |
| [29] | Non-AI-Based<br>Scope: India    | Tablet devices                                                                                                                                          | <ul style="list-style-type: none"> <li>- Mitigating healthcare accessibility related challenges especially in rural areas;</li> <li>- Online consultation (using JITS) and prescription</li> <li>- Reducing the "digital divide" in usability and adoption of technology-based solutions in rural areas</li> <li>- Efficacy of the telemedicine models</li> </ul> | <ul style="list-style-type: none"> <li>- Network issues</li> <li>- System reliability issues</li> <li>- Technical glitches</li> <li>- Lack of knowledge, technical literacy, and skills needed to use virtual medical services</li> <li>- Lack of public or private sector support for advancing medical technology that meets the demands of the populace</li> <li>- People's uncertainty about using technology</li> <li>- Some users (especially those in villages) do not use phones</li> <li>- Privacy, policy and security issues</li> <li>- It is difficult to have the same doctor(s) for follow-up appointments</li> <li>- Insufficient bandwidth and resources, as well as effective effort maintenance</li> </ul> |
| [30] | Non-AI-Based<br>Scope: Pakistan | Covid-Rapid API, Google Cloud Healthcare, Acurata Triage, iHealth, Uber                                                                                 | <ul style="list-style-type: none"> <li>- Health status detection and triage</li> <li>- Remote monitoring, management, and care delivery</li> <li>- Ordering medications and tele-prescriptions</li> <li>- Scheduling telehealth appointments</li> </ul>                                                                                                           | <ul style="list-style-type: none"> <li>- Scalability, interoperability, and auditability issues</li> <li>- Privacy, policy and security issues</li> <li>- Lack of knowledge, technical literacy, and skills needed to use virtual medical services</li> </ul>                                                                                                                                                                                                                                                                                                                                                                                                                                                                |

|      |                                      |                                                                                          |                                                                                                                                                                                                                                                                                                                                                                                                                                                                |                                                                                                                                                                                                                                                                                                                                                                 |
|------|--------------------------------------|------------------------------------------------------------------------------------------|----------------------------------------------------------------------------------------------------------------------------------------------------------------------------------------------------------------------------------------------------------------------------------------------------------------------------------------------------------------------------------------------------------------------------------------------------------------|-----------------------------------------------------------------------------------------------------------------------------------------------------------------------------------------------------------------------------------------------------------------------------------------------------------------------------------------------------------------|
|      |                                      | Health, CVS Pharmacy API, Uber Eats                                                      | <ul style="list-style-type: none"> <li>- Scheduling transport for dialysis, order groceries, order meals</li> </ul>                                                                                                                                                                                                                                                                                                                                            | <ul style="list-style-type: none"> <li>- Network issues</li> <li>- Policy and regulatory issues</li> </ul>                                                                                                                                                                                                                                                      |
| [31] | AI-Based<br><b>Scope:</b> Bangladesh | Mobile App, Fuzzy Neural Network, Logistic Regression Model, Bayesian Decision Tree      | <ul style="list-style-type: none"> <li>- Disease detection, tracking, and monitoring</li> <li>- Self-testing, real-time health status detection</li> <li>- Proximity detection and contact tracing</li> </ul>                                                                                                                                                                                                                                                  | <ul style="list-style-type: none"> <li>- Privacy and security and issues</li> <li>- Policy and regulatory issues</li> <li>- Network issues</li> </ul>                                                                                                                                                                                                           |
| [32] | AI-Based<br><b>Scope:</b> Austria    | Adafruit Bluefruit LE module, LCDR display, Thermistor                                   | <ul style="list-style-type: none"> <li>- COVID-19 symptoms checking</li> <li>- Easy and simple to use</li> <li>- Measure user's temperature</li> <li>- Medical diagnosis</li> </ul>                                                                                                                                                                                                                                                                            | <ul style="list-style-type: none"> <li>- Cost associated with developing, subscribing, using, or maintaining the system</li> <li>- Difficulty in accurately differentiating between COVID-19 and typical pneumonia or other relevant diseases</li> </ul>                                                                                                        |
| [33] | AI-Based<br><b>Scope:</b> China      | Deep learning/machine learning models                                                    | <ul style="list-style-type: none"> <li>- COVID-19 disease detection and diagnosis</li> </ul>                                                                                                                                                                                                                                                                                                                                                                   | <ul style="list-style-type: none"> <li>- While telehealth technologies supply high-quality healthcare services, they cannot entirely replace physical treatment</li> <li>- People's uncertainty about using technology</li> <li>- Difficulty in accurately differentiating between COVID-19 and typical pneumonia or other relevant diseases</li> </ul>         |
| [34] | AI-Based<br><b>Scope:</b> US         | LTESafe – CNN based Contact Feature Extractor                                            | <ul style="list-style-type: none"> <li>- Contact tracing and monitoring</li> <li>- Privacy-preservation</li> <li>- Help in containing the spread of COVID-19</li> </ul>                                                                                                                                                                                                                                                                                        | <ul style="list-style-type: none"> <li>- Performance and accuracy issues</li> </ul>                                                                                                                                                                                                                                                                             |
| [35] | Non-AI-Based<br><b>Scope:</b> KSA    | Mobile Apps: TH mobile applications (e.g., Seha, Mawid, Tawakklna, Tabaud, and Tetamman) | <ul style="list-style-type: none"> <li>- Patient tracking, triage, and monitoring</li> <li>- Patient health and vaccination status checker</li> <li>- Medical diagnosis</li> <li>- Online consultations, prescription refills, and follow-ups</li> <li>- Reducing patient expense for healthcare services provided</li> <li>- Prevent the medical front-line workers from the disease contraction</li> <li>- Detection and surveillance of COVID-19</li> </ul> | <ul style="list-style-type: none"> <li>- Lack of knowledge, technical literacy, and skills needed to use virtual medical services</li> <li>- Compatibility issues (e.g. some systems only support Android 5.0 and higher, or iOS 10.3 and higher)</li> </ul>                                                                                                    |
| [36] | Non-AI-Based<br><b>Scope:</b> Qatar  | Mobile App: Ehteraz                                                                      | <ul style="list-style-type: none"> <li>- Patient tracking, triage, and monitoring</li> <li>- Patient health and vaccination status checker</li> <li>- Medical diagnosis</li> <li>- Online consultations, prescription refills, and follow-ups</li> <li>- Reducing patient expense for healthcare services provided</li> <li>- Prevent the medical front-line workers from the disease contraction</li> <li>- Detection and surveillance of COVID-19</li> </ul> | <ul style="list-style-type: none"> <li>- Lack of knowledge, technical literacy, and skills needed to use virtual medical services</li> <li>- Compatibility issues (e.g. some systems only support Android 5.0 and higher, or iOS 10.3 and higher)</li> </ul>                                                                                                    |
| [37] | Non-AI-Based<br><b>Scope:</b> Brazil | Mobile Apps                                                                              | <ul style="list-style-type: none"> <li>- Remote screening, care, and treatment</li> <li>- Assists in monitoring, surveillance, detection, prevention, and mitigation of the impacts on healthcare indirectly related to COVID-19.</li> </ul>                                                                                                                                                                                                                   | <ul style="list-style-type: none"> <li>- Policy and regulatory issues</li> <li>- Lack of knowledge, technical literacy, and skills needed to use virtual medical services</li> <li>- Privacy, policy and security issues</li> <li>- Lack of public or private sector support for advancing medical technology that meets the demands of the populace</li> </ul> |
